# Supplementary material for: Public School Food Supply Chain during the COVID-19 Pandemic: A Case Study of the City of Vitória (Brazil)
Source: MDPI journal article supplement (doi:10.3390/logistics6010020), 2022-03-04
Supplement: s1 [file s1]

Archive with 2 entries (2 files):
- Pesquisa_ Distribuiç╞o de Kit's Alimentaç╞o da Rede Municipal de Ensino de Vitória - Diretores - Formulários Google.pdf
- Pesquisa_ Distribuiç╞o Kit's Alimentaç╞o Rede Municipal de Ensino de Vitória - Beneficiários _ Pais ou Responsáveis de Alunos - Formulários Google.pdf
