# Supplementary material for: Public School Food Supply Chain during the COVID-19 Pandemic: A Case Study of the City of Vitória (Brazil)
Source: MDPI journal article supplement (doi:10.3390/logistics6010020), 2022-03-04
Supplement: s1 [file s1]

# Survey: Distribution of Food Kits for the Public Schools of Vitoria – beneficiaries (students' parents or guardians)

This survey aims to get information about the distribution of food kit for Public-schools during COVID-19 in the city of Vitoria-ES.

This survey requires 05 minutes to be answered.

This research will be used only for academical purposes.

---

## \*Obrigatório

1. Do you agree that the information collected from this survey will be used for the research about the distribution of food kits for the public schools of Vitoria (without personal identification)? \*

*Marcar apenas uma oval.*

- ☐ Yes, I agree
- ☐ No, I don't agree.

2. How many children do you have currently enrolled in the Public Schools of Vitoria? \*

*Marcar apenas uma oval.*

- ☐ None
- ☐ 01
- ☐ 02
- ☐ 03
- ☐ 04 or more

3. Did you receive the Food Kit accordingly with the number of children enrolled? \*

*Marcar apenas uma oval.*

- ☐ Yes, I did.
- ☐ No, I did not.

## 4. Do you have children enrolled in Public Schools outside of Vitoria? \*

*Marcar apenas uma oval.*

- ☐ No, I don't.
- ☐ Yes, I do. The Food Kit distributed was better than the kit distributed for the Public Schools of Vitoria.
- ☐ Yes, I do. The Food Kit distributed was as good as the kit distributed for the Public Schools of Vitoria.
- ☐ Yes, I do. The Food Kit distributed was worse than the kit distributed for the Public Schools of Vitoria.

## 5. How have you been informed about the Food Kit withdraw at the schools? \*

*Marcar apenas uma oval.*

- ☐ by the media (internet, TV, radio, social media)
- ☐ by the community
- ☐ by another parent or guardian
- ☐ by the school
- ☐ by others

## 6. How far did you walk or drive from the school to you home? \*

*Marcar apenas uma oval.*

- ☐ Less than 01kilometer
- ☐ 01 to 03 kolometer
- ☐ 03 to 06 kilometer
- ☐ More than 06 kilometer

7. Did you have any trouble or difficulty to carry the Food Kit from the school to your home? \*

*Marcar apenas uma oval.*

- ☐ Yes, bridge
- ☐ Yes, footbridge
- ☐ Yes, stairway
- ☐ Yes, distance
- ☐ No, I didn't.
- ☐ Yes, other.

8. How did you transport the Food Kit? \*

*Marcar apenas uma oval.*

- ☐ by foot
- ☐ by car
- ☐ by app car
- ☐ by bicycle
- ☐ by bus
- ☐ by motorbicycle
- ☐ by other

9. How were the deliveries in the peak of Pandemic? Were you able to follow all the recommendations to withdraw the kit? (Wear mask, bring a pen, leave your children at home). \*

*Marcar apenas uma oval.*

- ☐ No, I were not able to follow any recommendation.
- ☐ Yes, I was able to follow all the recommendation.
- ☐ No, I did not bring a pen.
- ☐ No, I did not wear a mask.
- ☐ No, I had to bring my children.
- ☐ No, I was not able to follow some other recommendation.

10. Did you need help from some other person to carry the Food Kit? Why? \*

*Marcar apenas uma oval.*

- ☐ No, I did not need any help.
- ☐ Yes, the kit was too heavy.
- ☐ Yes, the package was not good.
- ☐ Yes, it was too far from my house.
- ☐ Yes, I needed to carry more than one kit.
- ☐ Yes, some other reason.

11. How long did you take to withdraw the kit in the school? \*

*Marcar apenas uma oval.*

- ☐ Less than 10 minutes
- ☐ 10 to 20 minutes
- ☐ 20 to 30 minutes
- ☐ 30 to 60 minutes
- ☐ More than 01 hour

12. How long did you wait in a line? \*

*Marcar apenas uma oval.*

- ☐ There was no line.
- ☐ Less than 10 minutes
- ☐ 10 to 20 minutes
- ☐ 20 to 30 minutes
- ☐ 30 to 60 minutes
- ☐ More than 01 hour

13. Did your kit have any kind of damage or problem? \*

*Marcar apenas uma oval.*

- ☐ No, it didn't have.
- ☐ Yes, one or more item was not sealed.
- ☐ Yes, one or more item was with the expiration date expired.
- ☐ Yes, one or more item was missing in the kit.
- ☐ Yes, some other issue.

14. When picking up the kit, did you sign any documents or records? \*

*Marcar apenas uma oval.*

- ☐ Yes, I did.
- ☐ No, I didn't.

15. Was your kit complete or did you have to return to the school Unit to pick up some item later? \*

*Marcar apenas uma oval.*

- ☐ The kit was complete.
- ☐ The kit was not complete. I had to come back to the school and had some problems to pick up the item that was missing.
- ☐ The kit was not complete. I had to come back to the school, but didn't have any problem to pick up the item that was missing.
- ☐ The kit was complete, but I had to come back to the school to return some unsuitable item.
- ☐ The kit was complete, but I had to come back to the school to pick up again a unsuitable item that I threw away

16. How many people live in your home? \*

*Marcar apenas uma oval.*

- ☐ 02
- ☐ 03
- ☐ 04
- ☐ 05
- ☐ more than 05 people

17. How long did the kit last on average? \*

*Marcar apenas uma oval.*

- ☐ Less than 01 month
- ☐ 01 month
- ☐ 02 months
- ☐ 03 months
- ☐ More than 03 months

18. How was the financial impact on your family income given the suspension of classes and the lack of school meals, \*

*Marcar apenas uma oval.*

- ☐ No impact
- ☐ A big impact
- ☐ A small impact

---

Este conteúdo não foi criado nem aprovado pelo Google.

Google Formulários
