# Supplementary material for: Public School Food Supply Chain during the COVID-19 Pandemic: A Case Study of the City of Vitória (Brazil)
Source: MDPI journal article supplement (doi:10.3390/logistics6010020), 2022-03-04
Supplement: s1 [file s1]

# Survey: Distribution of Food Kits for the Public Schools of Vitoria – beneficiaries (students' parents or guardians)

This survey has the objective of collect information about the distribution of food kits for the Public-schools of Vitoria - ES.

This data will be used only for academical purpose.

---

## \*Obrigatório

1. Do you agree that the information collected from this survey will be used for the research about the distribution of food kits for the public schools of Vitoria (without personal identification)? \*

*Marcar apenas uma oval.*

- ☐ Yes, I agree.
- ☐ No, I don't agree.

2. What is the zone of your school unity? \*

*Marcar apenas uma oval.*

- ☐ Zone 1 - CENTRO
- ☐ Zone 2 - SANTO ANTÔNIO
- ☐ Zone 3 - JUCUTUQUARA
- ☐ Zone 4 - MARUÍPE
- ☐ Zone 5 - PRAIA DO CANTO
- ☐ Zone 6 - GOIABEIRAS
- ☐ Zone 7 - SÃO PEDRO
- ☐ Zone 8 - JARDIM CAMBURI

3. Did SEME (Municipal Department of Education) present the schedule with quantities, dates and times of deliveries of food kits by the suppliers? \*

*Marcar apenas uma oval.*

- ☐ Yes, and the established deadline and quantities were met.
- ☐ Yes, but the deadline was not met.
- ☐ Yes, but the quantities were not met.
- ☐ No, I did not receive any information about the suppliers' deliveries.

4. Was it possible to flexibilize the withdrawal period for beneficiaries who were unable to take the kit in the determined period? \*

*Marcar apenas uma oval.*

- ☐ Yes, it was.
- ☐ No, it wasn't.

5. What was the biggest issue in the delivery of food kits by the suppliers? \*

*Marcar apenas uma oval.*

- ☐ School unit access
- ☐ Check out
- ☐ Lack of manpower
- ☐ Truck unloading
- ☐ There was any issue.

6. Did you need to postpone or extend the delivery deadline date due to a specific item missing, damaged or having poor quality? \*

*Marcar apenas uma oval.*

- ☐ No, we didn't have any problem.
- ☐ Yes, we did need because of problems in the kit (dry or non perishable food).
- ☐ Yes, we did need because of problems in the chicken eggs.

## 7. How many items end up classified as unsuitable food to consume? \*

*Marcar apenas uma oval.*

- ☐ No item.
- ☐ Few items.
- ☐ Many items.
- ☐ A reasonable amount of items

## 8. Did you recheck the kit to verify the food condition before the delivery to parents and guardians? \*

*Marcar apenas uma oval.*

- ☐ No, we didn't.
- ☐ Yes, we did.

## 9. Did you have difficulties in returning these unsuitable food items? \*

*Marcar apenas uma oval.*

- ☐ We didn't have any item return.
- ☐ Yes, we did.
- ☐ No, we didn't.
- ☐ I don't know.

## 10. What was the biggest issue in the kit delivery process? \*

*Marcar apenas uma oval.*

- ☐ Lack of personal protection equipment (PPE)
- ☐ Food items low quality
- ☐ Lack of manpower
- ☐ Agglomeration
- ☐ Other

11. How long it take to deliver the food kits to all beneficiaries in your school unit? \*

*Marcar apenas uma oval.*

- ☐ 01 day
- ☐ 02 days
- ☐ 03 days
- ☐ More than 03 days

12. The food kit was delivered for those families that were in isolation because of COVID symptoms? \*

*Marcar apenas uma oval.*

- ☐ Yes, it was.
- ☐ No, it wasn't.

13. What was the biggest reason why some beneficieries didn't withdraw the food kit? \*

*Marcar apenas uma oval.*

- ☐ Day and time for withdrawals
- ☐ Distance
- ☐ Abstention
- ☐ Social isolation because of COVID symptoms
- ☐ Other reason

14. How long in average each beneficiary take to get the food kit at the school unit? \*

*Marcar apenas uma oval.*

- ☐ 0 – 10min
- ☐ 10 – 20min
- ☐ 20 – 30min
- ☐ 30 – 60min
- ☐ More than 01 hour

15. Was there any queue or agglomeration during the delivery of the food kits? \*

*Marcar apenas uma oval.*

- ☐ Yes, there was.
- ☐ No, there wasn't.

16. Did you have many complaints or dissatisfactions from the students' parents or guardins? \*

*Marcar apenas uma oval.*

- ☐ No, we didn't.
- ☐ Yes, we did.

17. Did the parents or guardians follow the recommendations? (wear masks, bring their own pens, do not bring their children) \*

*Marcar apenas uma oval.*

- ☐ No, they didn't follow any recommendation.
- ☐ Yes, they follow all the recommendations.
- ☐ They follow only partially the recommendations.

18. Were the PPE made available and used by the professionals according to requirements and recommendations? \*

*Marcar apenas uma oval.*

- ☐ Yes, they were for all the professionals.
- ☐ We did not receive any PPE.
- ☐ They were made available only for a few professionals.

19. As a professional that participated of the food kits delivery process, what suggestion would you make to improve the delivery of kits? \*

---

---

---

---

---

20. In case you have a child enrolled in some Public-school, what suggestion would you make to improve the deliveries of food kits?

---

---

---

---

---

---

Este conteúdo não foi criado nem aprovado pelo Google.

Google Formulários
